# Supplementary material for: Imidacloprid disrupts larval molting regulation and nutrient energy metabolism, causing developmental delay in honey bee Apis mellifera
Source: eLife. 2024 Mar 11;12:RP88772. doi: 10.7554/eLife.88772 (PMC10928512; doi:10.7554/eLife.88772)
Supplement: Figure 2—source data 1. [file elife-88772-fig2-data1.csv]

CK	IMI
1.152432	0.362038
1.266392	0.56346234
0.943535	0.68945
