# Supplementary material for: Imidacloprid disrupts larval molting regulation and nutrient energy metabolism, causing developmental delay in honey bee Apis mellifera
Source: eLife. 2024 Mar 11;12:RP88772. doi: 10.7554/eLife.88772 (PMC10928512; doi:10.7554/eLife.88772)
Supplement: Figure 6—source data 6. [file elife-88772-fig6-data6.csv]

	Tango7	elF3-S9	elF3-S10
CK-1	1.064162347	1.050076181	1.070391594
CK-2	0.994442631	1.053679085	0.988124753
CK-3	0.941395022	0.896244735	0.941483653
IMI-1	0.889147598	0.822860216	0.841387621
IMI-2	0.763479019	0.917626146	0.897808226
IMI-3	0.849317175	0.824613868	0.994853223
