# Supplementary material for: Imidacloprid disrupts larval molting regulation and nutrient energy metabolism, causing developmental delay in honey bee Apis mellifera
Source: eLife. 2024 Mar 11;12:RP88772. doi: 10.7554/eLife.88772 (PMC10928512; doi:10.7554/eLife.88772)
Supplement: Figure 6—source data 8. [file elife-88772-fig6-data8.csv]

	CK	CK	CK	IMI	IMI	IMI
Total glycogen	1.154552338	0.904127686	0.978425603	0.73976683	0.649422468	0.774511801
